1  
2  
3  
4  
5  
6  
7  
8  
9  
10  
11  
12  
13  
14  
15  
16  
17

## Title Page

# Making plants into cost-effective bioreactors for highly active antimicrobial peptides

Meron R Ghidey<sup>1</sup>, S M Ashiqul Islam<sup>1</sup>, Grace Pruett<sup>2</sup>, Christopher Michel Kearney<sup>1,2\*</sup>

<sup>1</sup>Biomedical Studies Program, Baylor University, Waco, TX, USA

<sup>2</sup>Department of Biology, Baylor University, Waco, TX, USA

\*Corresponding author:

[Chris\\_Kearney@baylor.edu](mailto:Chris_Kearney@baylor.edu)

ORCID: 0000-0001-8178-9389

**Keywords:** antimicrobial peptides, plant expression, *Nicotiana benthamiana*, elastin-like peptide, heterologous protein expression.

**Acknowledgements:** We thank the Baylor Mass Spectrometry Center and Molecular Biology Center for expert advice and facilities.

18 **Abstract**

19 As antibiotic-resistant bacterial pathogens become an ever-increasing concern, antimicrobial peptides (AMPs) have  
20 grown increasingly attractive as alternatives. Potentially, plants could be used as cost-effective AMP bioreactors;  
21 however, reported heterologous AMP expression is much lower in plants compared to *E. coli* expression systems  
22 and often results in plant cytotoxicity, even for AMPs fused to carrier proteins. We wondered if there were a  
23 physical factor that made heterologous AMPs difficult to express in plants. Using a meta-analysis of protein  
24 databases, we determined that native plant AMPs were significantly less cationic than AMPs native to other taxa.  
25 To apply this finding to plant expression, we tested the transient expression of 10 different heterologous AMPs,  
26 ranging in charge from +7 to -5, in the the tobacco, *Nicotiana benthamiana*. We first tested several carrier proteins  
27 and were able to express AMPs only with elastin-like polypeptide (ELP). Conveniently, ELP fusion allows for a  
28 simple, cost-effective temperature shift purification. Using the ELP system, all five anionic AMPs expressed well,  
29 with two at unusually high levels (375 and 563  $\mu\text{g/gfw}$ ). Furthermore, antimicrobial activity against *Staphylococcus*  
30 *epidermidis* was an order of magnitude stronger (average MIC = 0.26  $\mu\text{M}$ ) than that typically seen for AMPs  
31 expressed in *E. coli* expression systems. Unexpectedly, this high level of antimicrobial activity was associated with  
32 the uncleaved fusion peptide. In contrast, all previous reports of AMPs expressed in both plant and *E. coli*  
33 expression systems show cleavage from the fusion partner to be required before activity is seen. In summary, we  
34 describe a means of expressing AMP fusions in plants in high yield, purified with a simple temperature-shift  
35 protocol, resulting in a fusion peptide with high antimicrobial activity, without the need for a peptide cleavage step.

36

37

## 38 Introduction

39 The use of traditional antibiotics to control bacterial infections is threatened due to two undermining factors.  
40 First, drug discovery for new antimicrobial agents has been on the decline for the past three decades. The major  
41 classes of antibiotics have already been discovered and commercial incentives to develop new antibiotics have  
42 decreased (Charles and Grayson, 2004; Norrby, *et al.*, 2005; Schäberle and Hack, 2014). Second, the overuse of  
43 antibiotics has led to pathogenic and commensal bacteria incorporating and retaining genes for detoxification or  
44 export of antibiotics, inevitably resulting in resistance to all new antibiotics introduced (Aminov *et al.* 2010; Thung  
45 *et al.*, 2015; Enright *et al.* 2002; Nathan and Cars, 2014).

46 Both of these undermining factors are addressed by antimicrobial peptides (AMPs). First, the resources  
47 available to develop new AMP drugs is vast and recombinant peptide variants can be quickly generated, unlike the  
48 slow discovery and development cycle for antibiotics. AMPs are abundant across the taxa, being found in  
49 vertebrates, insects, fungi and plants. Thousands of AMPs have been isolated and tested experimentally (Wang *et*  
50 *al.*, 2015) and many more can be discovered using algorithms to scan genome data bases (Islam *et al.*, 2018b).  
51 Second, though resistance to AMPs has been shown to develop in bacteria (Kubicek-Sutherland *et al.*, 2017), the  
52 multiple antimicrobial activities and low affinity targets typical of AMPs have been thought to make them more  
53 difficult targets for resistance development by pathogenic bacteria (Peschel and Sahl, 2006). From an environmental  
54 perspective, AMPs are not long-lasting in waste water, whereas low concentrations of antibiotics can induce  
55 resistance in soil and water-borne microbial communities (Bengtsson-Palme *et al.*, 2018).

56 AMPs are not capable of completely replacing antibiotics, but could serve as replacements for some  
57 applications if they were produced at low cost. Though AMPs have been used clinically (Marr *et al.*, 2006), AMPs  
58 have a special potential for large-scale applications. Examples might include their use as a food preservative, as a  
59 topical disinfectant, or as a feed supplement for livestock or poultry. These sorts of applications would be dependent  
60 upon developing scalable and simple protocols for both production and purification.

61 Currently, there remain some roadblocks to developing these simplified protocols for large scale production. *E.*  
62 *coli* expression systems have been extensively demonstrated to effectively produce AMPs, but the AMP must be  
63 fused to a carrier protein in order to protect the bacterium from antimicrobial activity (Li, 2009). Various fusion

64 partners have been used, such as SUMO (Li *et al.*, 2009a; Zhang *et al.*, 2015), GST (Liang *et al.*, 2006) and TRX  
65 (Tian *et al.*, 2009), but these must be removed post-production to restore antimicrobial activity to the AMP, adding  
66 an extra cost to production. A variety of ingenious methods have been proposed to perform the cleavage event  
67 without the use of proteases post-production (Tian *et al.*, 2009; Ke *et al.*, 2012), but, with one exception (Rothan *et*  
68 *al.*, 2014), AMPs that retain antimicrobial activity while still bound to the fusion partner have not been produced in  
69 bacteria. Plant expression of AMPs is an attractive alternative, since they are not themselves targeted by AMPs and  
70 have potential as highly scalable protein production systems. However, the yields so far reported for plant  
71 expression of AMPs (Lee *et al.*, 2010; Patino-Rodriguez *et al.*, 2013; Bundó *et al.*, 2014) have been much lower  
72 than those reported for *E. coli* expression systems (Li, 2011). Even if production levels were competitive with *E.*  
73 *coli* systems, downstream processing contributes the bulk of production costs (Wilken and Nikolov, 2012), and this  
74 must be addressed especially for low-cost/large-scale applications.

75 We have expressed AMPs in a plant expression system and have addressed the two roadblocks mentioned  
76 above, achieving high expression of AMPs in plants and avoiding the carrier protein cleavage step, using a simple  
77 purification protocol. To increase yield of AMP fusion proteins in plants, we examined factors that might be  
78 responsible for low plant yield. We found that peptide charge was correlated with yield, as all of the anionic AMP  
79 fusions we tested were expressed in plants while none of the cationic peptides produced any detectable AMP fusion  
80 protein. To reduce downstream processing costs, we used an elastin-like polypeptide (ELP) carrier protein (Floss *et*  
81 *al.*, 2009), which confers to the fusion protein insolubility at 37°C, at which most protein contaminants are soluble,  
82 and solubility at 4°C. Centrifugation at 37°C pellets the fusion protein, which is then resuspended at 4°C.  
83 Unexpectedly, we found that the ELP-AMP fusions had antimicrobial activity without a protease cleavage step,  
84 which should further reduce post-production costs. This activity was, in fact, at least 10x stronger than that typically  
85 reported for cleaved AMPs produced in *E. coli* expression studies (Wei *et al.*, 2005; Tian *et al.*, 2009) or from AMPs  
86 synthetically produced (He and Lazaridis, 2013; Ebbensgaard *et al.*, 2015; Kubicek-Sutherland *et al.*, 2017). Thus,  
87 this system fully leverages the potential unique advantages of plant production of AMPs as compared to other modes  
88 of production. The described method may thus serve as an antibiotic replacement platform for applications requiring  
89 large-scale, low-cost protocols.

90

## 91 **Materials and Methods**

### 92 **Computation of hydrophobic ratio and net charge distributions from published sequences of STP-AMPs**

93 AMP databases (PMID: 26602694, PMID: 18957441) were examined to determine correlations between  
94 taxonomic distribution and two protein structural factors, hydrophobicity and net charge. First, candidate peptide  
95 sequences were collected. To reduce other factors in the comparisons, the only AMPs examined were those having  
96 the most commonly occurring AMP structure, namely the sequential tri-disulfide peptide (STP) structure (Islam *et*  
97 *al.*, 2015; Islam *et al.*, 2018b). To collect STP-AMPSSs, AMPs ranging from 30 to 50 amino acids were manually  
98 processed through the PredSTP tool (Islam *et al.* 2015) and the resulting peptide sequences were collected. We used  
99 the CD-HIT [PMID: 23060610] program to remove redundant sequences by setting a cutoff of sequence identity at  
100 80%. The remaining sequences were grouped into the plant or non-plant origins using the original metadata.

101 After the candidate peptide sequences were collected, the hydrophobic ratio and the net charge of each sequence  
102 was calculated applying the identical formula used in the ADP3 server (PMID: 18957441). For the hydrophobicity  
103 calculation, A, I, L, M, W, V, C and F were considered hydrophobic amino acids, as shown below, with  $n$  being the  
104 number of occurrences of each corresponding amino acid in the peptide and  $L$  being the total number of amino  
105 acids in the peptide.

$$106 \text{ **Hydrophobic ratio} = \frac{\sum(nA+nI+nL+nM+nW+nV+nC+nF)}{L} \times 100 \dots\dots\dots(\text{Equation 1})**$$

107 For the net charge calculations, the difference between the counts of negative (D + E) and positive (R + K) amino  
108 acids was defined as net charge for each peptide:

$$109 \text{ **Net charge} = (nR + nK) - (nD + nE) \dots\dots\dots(\text{Equation 2})**$$

110 ANOVA tests were performed using R version 3.4.0 to observe any significant difference in the mean of  
111 hydrophobic ratio or net-charge in the STP-AMP sequences from plant or non-plant origins.

112

113

114 **Preliminary vector work**

115 In preliminary experiments, two carrier proteins were tested as fusion partners for AMP transient expression in  
116 *N. benthamiana* via leaf agroinoculation. This work was performed before the meta-analysis of peptide charge  
117 described above. First, AMP was fused to the C-terminus of Jun a 3, a protein that expresses strongly and  
118 accumulates well in the apoplast of tobacco (Moehnke *et al.*, 2008). The Jun a 3 fusion was expressed using the  
119 plant viral vector FECT (Liu and Kearney, 2010). The AMPs tested were C16G2(+9), tachystatin B-1 (+7),  
120 protegrin (+6) and circulin-A(+2). No AMP expression was detected by SDS-PAGE/Coomassie Blue analysis (data  
121 not shown). Second, AMP was fused between eGFP and hydrophobin in the plant expression vector pCaMterX  
122 (Joensuu *et al.*, 2010). The AMPs tested were C16G2(+9), tachystatin B-1 (+7), sarcotoxin (+5), circulin-A(+2) and  
123 laterosporulin (-1). No AMP expression was detected by SDS-PAGE/Coomassie Blue analysis (data not shown).  
124 However, some GFP fluorescence was noted in plants inoculated with the anionic laterosporulin construct. In  
125 addition, the anionic insecticidal STP, Hv1a (-1), used as a positive control, expressed well in both of these systems.  
126 These were the first experimental data suggesting that peptide net charge may be a factor in the successful plant  
127 expression of AMPs.

128 **ELP vector**

129 All subsequent work in the comparative expression of AMPs of different net charge was carried out using the  
130 ELP carrier protein. The ELP used in our study comprised 28 units of VPGVP pentapeptide repeats fused to the  
131 protein of interest (Conley *et al.*, 2009b). The pCaMterX/ELP vector was modified to include unique restriction sites  
132 to allow insertion of AMP open reading frames (ORFs) with the excision of the eGFP ORF native to the original  
133 vector (Figure 1). Additionally, a TEV protease cleavage site (ENLYFQ) was inserted at the C-terminus of the  
134 AMP. The final construct allows for insertion/replacement at three sites for marker genes, AMPs and purifications  
135 tag (Figure 1).

136

137 **Fig. 1** STP-AMP/Elastin-like  
138 polypeptide fusion sequence  
139 expressed via agroinoculation in  
140 *Nicotiana benthamiana*. 35S,  
141 CaMV 35S dual enhancer  
142 promoter; tCUP, translational  
143 enhancer; Pr1b SP, tobacco  
144 secretory signal peptide; KDEL,  
145 ER retention signal; TEV,  
146 tobacco etch virus protease  
147 recognition site (ENLYFQ).

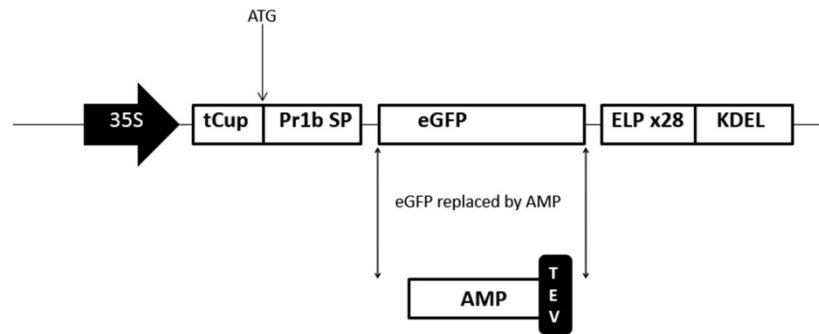

148

### 149 **Agroinoculation, protein purification and analysis**

150 *Agrobacterium tumefaciens* strain GV3101 was electroporated with the AMP/ELP binary vector and  
151 agroinoculation proceeded as described (Liu and Kearney, 2010), including the silencing suppressor, p19. All  
152 experiments were done in triplicate. As negative and positive controls, uninfected leaves and leaves infected with  
153 the original eGFP/ELP construct were collected and processed through the same ELP extraction and purification  
154 processing as the AMP/ELP samples.

155 AMP/ELP purification was performed as previously described (Conley *et al.*, 2009a). Specifically, plant leaves  
156 collected at 3-4 days post-inoculation were frozen in liquid nitrogen and ground with a pre-chilled mortar and pestle,  
157 then homogenized in three volumes (v/w) of ice cold 1X PBS. Extract was centrifuged in 4°C at 20,000 x g for 15  
158 minutes. For the temperature-dependent inverse transition cycling, the supernatant above was warmed in a 37°C  
159 water bath with NaCl added to a concentration of 3 M. After 15-45 minutes of incubation extract was centrifuged at  
160 37°C for 20,000 x g for 15 minutes. Supernatant was discarded, and the pellet was resuspended in ice cold 1X PBS  
161 at 1/10<sup>th</sup> the volume and centrifuged at 4°C at 20,000 x g for 15 minutes. The resulting supernatant was the  
162 uncleaved protein product used for microbial inhibition studies.

163 To test the effect of cleavage on the fusion protein's toxicity, AMP/ELP protein from the resuspended pellet  
164 was cleaved with TEV protease at a mass ratio of 4:1 in TEV protease buffer (50 mM tris HCl (pH 8.0), 0.5 mM  
165 EDTA, 1 mM DTT). The cleavage products (AMP and ELP) were not separately isolated and were analyzed as a  
166 mixed solution.

167 Protein extracts were analyzed by SDS-PAGE and mass spectrometry. Recombinant AMP protein yield was  
168 assessed by densitometry of SDS-PAGE band images measured against a BSA standard using NIH ImageJ. Mass  
169 spectrometry was used to confirm the presence of intact AMP and carrier peptide after TEV protease treatment and  
170 to confirm the identity of AMP-ELP fusion peptide from extracts not treated with TEV protease. Specifically,  
171 AMP/ELP fusion protein was first extracted from leaves using two cycles of the temperature shift protocol described  
172 above and TEV protease was used to cleave the fusion peptide into AMP and ELP. Cleaved or uncleaved fusion  
173 peptide was digested with trypsin and analyzed using LC-ESI-MS (Synapt G2-S, Waters) at the Baylor University  
174 Mass Spectrophotometry Center, followed by data analysis using MassLynx (v4.1). The results can be found in  
175 Supplementary Figures 5-40.

#### 176 **Antibacterial assay of recombinant AMPs (MIC assays)**

177 Purified AMPs and AMP/ELP fusion peptides were tested for their antimicrobial activity using a Minimum  
178 Inhibitory Concentration (MIC) assay. Specifically, 10 mL of *Staphylococcus epidermidis* was grown overnight in a  
179 shake culture at 150 rpm at 37°C. Turbidity was assessed with McFarland standard tubes and the culture was diluted  
180 to 0.5 OD<sub>600</sub>. The peptide was first added to the first well of a 96-well microtiter plate and serial 1:2 dilutions of the  
181 peptide were made across the plate using fresh LB medium. Then, 100 µl of *S. epidermidis* culture was added to  
182 each well containing the peptide dilutions and the culture was allowed to grow in the well at 37°C without shaking.  
183 To measure bacterial growth, resazurin was added to 0.00015% and plates were allowed to grow an additional 30-  
184 120 minutes until dye color changed to indicate bacterial growth or inactivity. All MIC experiments were run in  
185 triplicate

186

187

188

189

190



## 191 **Results**

### 192 **STP-AMPs native to plants are less cationic than those from non-plant sources**

193 We questioned why AMPs from non-plant sources generally express poorly as foreign genes in plant expression  
194 systems. We hypothesized that there may be a certain property characteristic to native plant AMPs that is not  
195 generally present in AMPs from other sources. We postulated that this property is necessary for robust expression of  
196 any AMP, from plant or non-plant origin, in heterologous plant expression systems. We selected AMP  
197 hydrophobicity and AMP net charge as two properties worth investigating.

198 We used a publicly available AMP database to access AMP sequences and metadata, but first applied filters to  
199 narrow the pool to those peptides of greatest practical value for heterologous expression in plants. Since we were  
200 most interested in peptides possessing the highly stable sequential tri-disulfide peptide (STP) structure, we used our  
201 PredSTP algorithm (Islam et al., 2015) to narrow the pool of AMPs gathered from the AMP database to only STPs.  
202 We further narrowed the pool to only peptides 30-50 amino acids in length and eliminated redundant sequences  
203 (80% sequence similarity cutoff), resulting in a final data set of 96 STP-AMPs of plant origin and 58 STP-AMPs of  
204 non-plant origin (Supplemental File 1).

205 Once the plant and non-plant STP-AMPs groups were collected, we compared them for hydrophobicity and net  
206 charge. We found no significant difference between the two groups in hydrophobicity (Figure 2). However, peptides  
207 of plant origin were found to be significantly less cationic than peptides of non-plant origin (Figure 2). A p-value  
208 of 4.47e-05 was determined by ANOVA for this comparison, with mean net charges of +1.77 versus +3.46 for STP-  
209 AMPs of plant vs. non-plant origin, respectively. Therefore, an unfavorably positive net charge may have been  
210 responsible for the poor expression of non-plant AMPs expressed in plant expression systems as reported in the  
211 literature to date.

212

213

214

215

216

217

218 **Fig. 2** Meta-analysis of AMPs from Antimicrobial  
 219 Peptide Database 2. Hydrophobicity and net charge  
 220 were calculated and compared for STP-AMPs native to  
 221 plant versus non-plant sources.

222

223

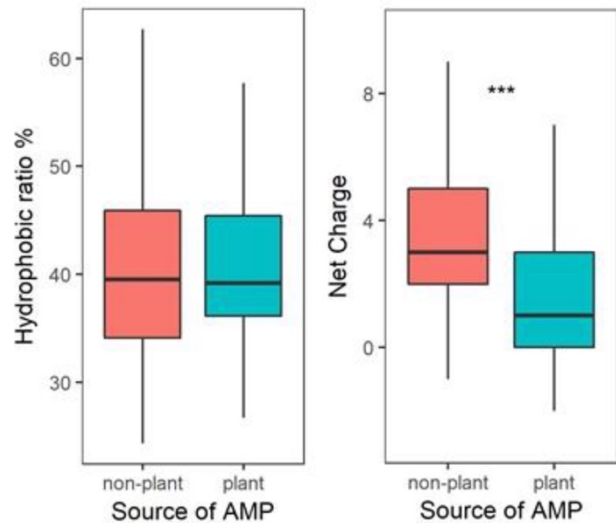

224 **Only anionic STP-ATP/ELP fusion proteins were expressed in transiently transgenic plants**

225 From these findings, we formed the hypothesis that the expression of AMPs in plant expression systems may be  
 226 improved by using AMPs which were anionic, neutral, or only slightly cationic. We tested this experimentally by  
 227 expressing in the tobacco *Nicotiana benthamiana* a set of 10 AMPs ranging in net charge from highly cationic (+7)  
 228 to highly anionic (-5). To eliminate the variables of peptide size, peptide structure and plant vs. non-plant origin, we  
 229 selected only AMPs of 30-50 amino acids in length, possessing a core STP structure, and being of non-plant origin  
 230 (Table 1).

231 **Table 1.** STP-AMPs cloned as ELP fusions and agroinoculated into *Nicotiana benthamiana*. The six cysteines  
 232 participating in disulfide bonding in the STP structure are underlined.

233

| AMP            | Amino Acid Sequence                                                                     | Net charge | Source         |
|----------------|-----------------------------------------------------------------------------------------|------------|----------------|
| Tachystatin B1 | YV <u>S</u> CLFRGARC <u>R</u> RVYSGR<br>SCCFGYY <u>C</u> RRDFPGSIFG<br>T <u>C</u> SRRNF | +7         | Horseshoe crab |

|                              |                                                                                                               |    |               |
|------------------------------|---------------------------------------------------------------------------------------------------------------|----|---------------|
| Charybdotoxin                | EFTNVS <u>C</u> TTSKE <u>C</u> WSV <u>C</u><br>QRLHNTSRGK <u>C</u> MN<br>KK <u>C</u> R <u>C</u> YS            | +5 | Scorpion      |
| Scapularisin-6               | GFG <u>C</u> PFDQGACHRH <u>C</u> QSI<br>GRRGGY <u>C</u> AGFIKQT <u>C</u> T <u>C</u><br>YHN                    | +3 | Tick/Arachnid |
| Plectasin                    | GFG <u>C</u> NGPWDEDDMQ <u>C</u><br>HNH <u>C</u> KSIGYKGGY <u>C</u> AK<br>GGFV <u>C</u> K <u>C</u> Y          | +1 | Fungus        |
| Eurocin                      | GFG <u>C</u> PGDAYQCSEH <u>C</u> R<br>ALGGGRTGGY <u>C</u> AGPWY<br>LGHPT <u>C</u> T <u>C</u> SF               | 0  | Fungus        |
| Laterosporulin               | AC <u>C</u> Q <u>C</u> PD AISGWTHTDYQ<br><u>C</u> HGLENKMYRHVYA <u>C</u><br>MNGTQVY <u>C</u> RTEWGSS <u>C</u> | -1 | Bacterium     |
| PopuDef                      | GASPALWG <u>C</u> DSFLGY <u>C</u> RI<br>A <u>C</u> FAHEASVGQK <u>C</u> AE <u>G</u><br>MI <u>C</u> CLPNVF      | -2 | Amphibian     |
| Defensin-TK                  | SPAIWG <u>C</u> DSFLGY <u>C</u> RL <u>C</u><br>FAHEASVGQKE <u>C</u> AE <u>G</u> ML<br><u>C</u> IPNV           | -2 | Amphibian     |
| Amblyomma defensin peptide 2 | YENPYG <u>C</u> PTDEGK <u>C</u> FDR<br><u>C</u> NDSEFEGGY <u>C</u> GGSYRA<br>T <u>C</u> V <u>C</u> YRT        | -3 | Tick          |
| SpliDef                      | VSCDFEEDAV <u>C</u> QEH<br><u>C</u> LPKGYTYG <u>C</u> VSHT <u>C</u> S<br><u>C</u> IYIVELIKWYTN <u>C</u> TYT   | -5 | Insect        |

234 When this range of 10 AMP/ELP fusions were expressed in *N. benthamiana* leaves, peptide net charge was seen  
 235 linked to both yield and plant symptoms. Plants inoculated with cationic peptides showed a strong tendency to  
 236 develop necrosis in the agroinoculated leaves and this effect was more severe the more cationic the peptide (Figure  
 237 3, top row). The neutral AMP, eurocin, and all anionic AMPs (bottom row) induced no leaf necrosis when  
 238 agroinoculated as AMP/ELP fusion peptides. In line with these symptom observations, no expression of AMP/ELP  
 239 was detected by SDS-PAGE with any of the cationic AMPs, nor with the neutral AMP, eurocin.

240 In contrast, every anionic AMP tested expressed as an AMP/ELP fusion to levels detectable by SDS-PAGE as a  
 241 simple extract (Figure 4). The lowest levels of expression of anionic AMP/ELP fusions yielded 20  $\mu\text{g}/\text{gram}$  fresh  
 242 weight, which is comparable to the highest levels reported for plant expression of AMPs (refs). Furthermore, for two  
 243 of the anionic AMP/ELP fusions, we noted over 10x greater expression with average yields of 375 and 563  $\mu\text{g}/\text{gram}$   
 244 fresh weight for laterosporulin-1 and ADP2-3, respectively (Figure 3). This corresponds to 180 and 225  $\mu\text{g}/\text{gram}$   
 245 fresh weight for each of the individual AMPs without the ELP carrier.

246

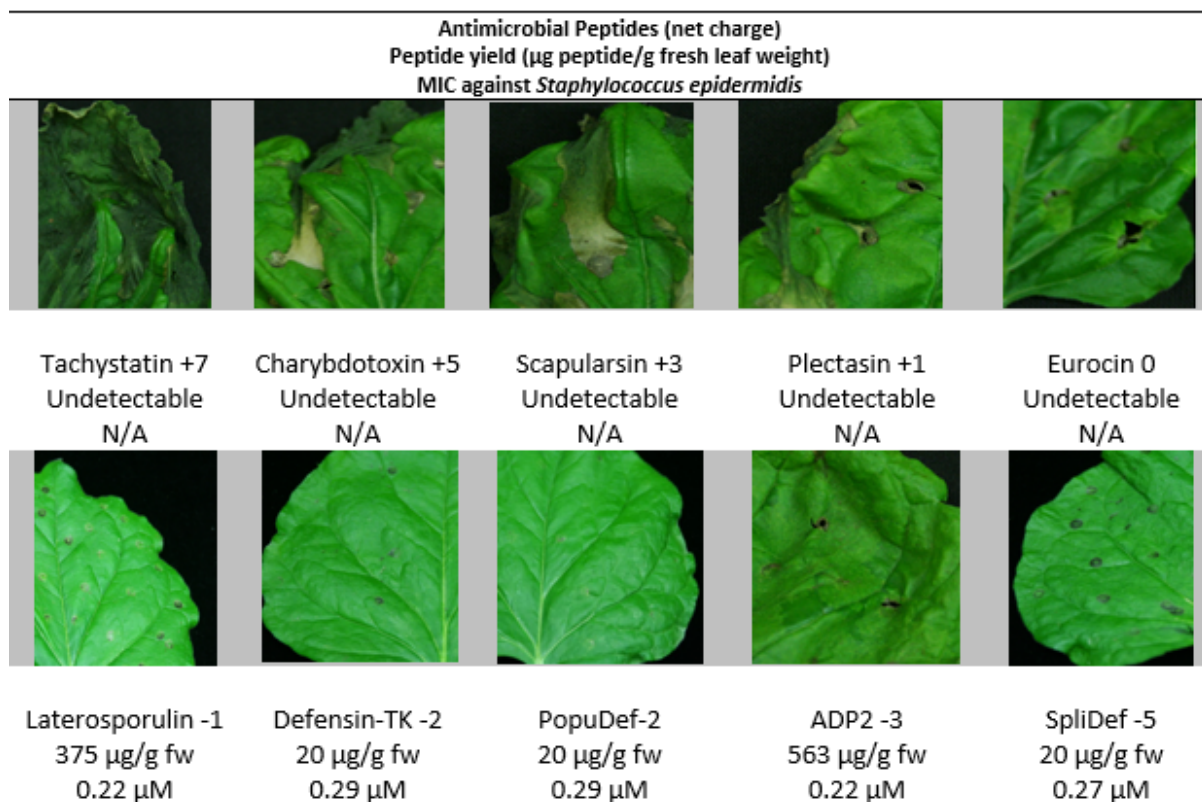

247

248 **Fig. 3** Expression of AMPs as ELP fusions in *Nicotiana benthamiana* via agroinoculation. Photos are displayed in  
 249 order of AMP net charge, from most cationic to most anionic, showing a corresponding decrease in leaf necrosis.  
 250 Peptide yield and minimum inhibitory concentration (MIC) values against *Staphylococcus epidermidis* for purified  
 251 fusion peptides are indicated in the second and third line under each photo. The circular necrotic spots seen in all  
 252 photos result from mechanical injury at agrobacterium injection points.

253

254 In SDS-PAGE analysis (Figure 4), extracts representing only one temperature shift cycle, with no further  
255 purification, were loaded onto the gel in order to demonstrate the purity of this relatively crude extract. The results  
256 also demonstrate the reliable yield obtained, as bands were clearly detectable for all anionic AMP/ELP peptides with  
257 standard Coomassie Blue staining even without any further concentration steps or nickel columns.

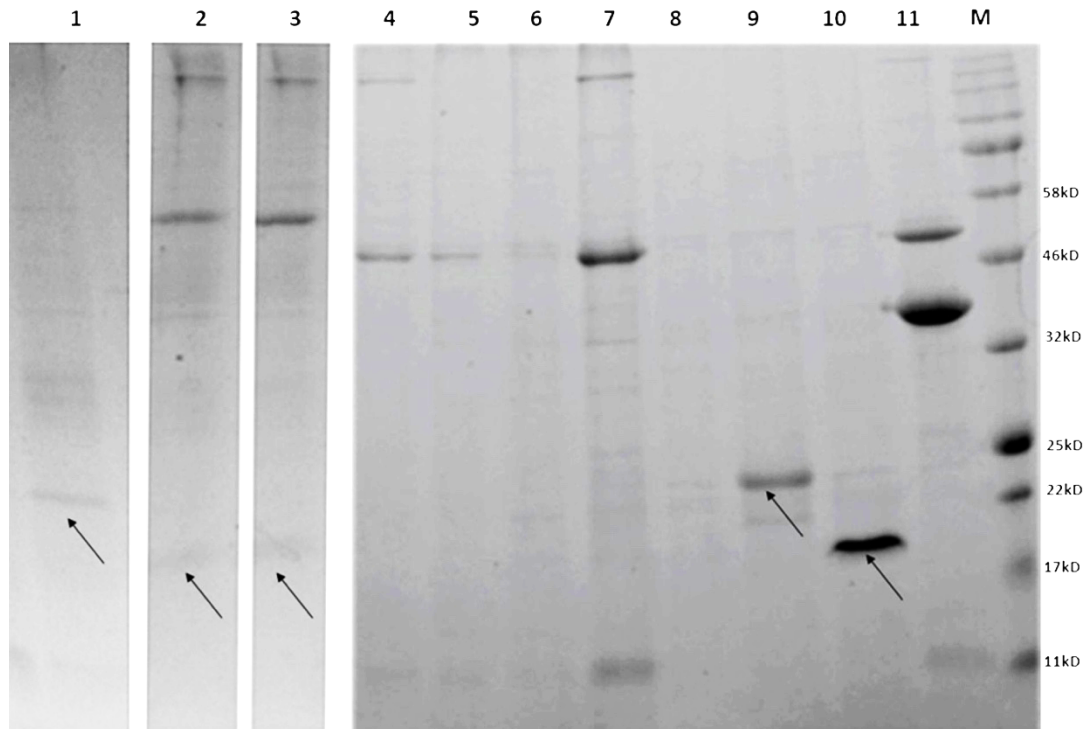

270

271 **Fig. 4** SDS-PAGE/Coomassie blue analysis of AMP/ELP fusion peptides expressed in *Nicotiana benthamiana*.  
272 AMP fusion protein expression was detected only for the anionic AMPs (arrows). Expression was especially strong  
273 for laterosporulin and ADP2 (Lanes 9 and 10). Lane 1, Defensin-TK; Lane 2, PopuDef; Lane 3, SpliDef; Lane 4,  
274 Tachystatin B1; Lane 5, Charybdotoxin; Lane 6, Scapularsin-6; Lane 7, Plectasin; Lane 8, Eurocin; Lane 9,  
275 Laterosporulin; Lane 10 ADP-2; Lane 11, ELP-EGFP positive control (35 kDa).

276

#### 277 **Uncleaved AMP/ELP fusions had strong antibacterial activity**

278 AMP/ELP fusion peptides of all of our anionic AMPs had unusually strong antibacterial activity as simple,  
279 unprocessed extracts. Against *Staphylococcus epidermidis*, our fusion peptides had MIC values that were  
280 consistently low (highly antibacterial), ranging from 0.22 - 0.29  $\mu$ M for all AMP/ELP fusions (Figure 3). In contrast,  
281 the published MIC values against the related *Staphylococcus aureus* for the same AMPs purified from their source

282 organisms are 7.5  $\mu\text{M}$  for ADP-2 and 2  $\mu\text{M}$  for laterosporulin (Lai *et al.* 2004; Singh *et al.*, 2012), which shows  
283 greater than 10-fold less antibacterial activity. Our GFP/ELP vector control gave an average MIC of 11.9  $\mu\text{M}$ ,  
284 demonstrating that the ELP carrier protein itself did not contribute significantly to antibacterial activity.

285 Attempts were made to find antibacterial activity in protease-treated extracts, but no activity was detected. To  
286 ensure that intact AMP was present after cleavage of the AMP/ELP fusion with TEV protease, protein analysis was  
287 performed by LC-EIS-MS for all fusions in the study that were successfully expressed in plants. For all of these,  
288 fully intact AMP was shown to be present in both the cleaved and uncleaved AMP/ELP fusion protein preparations  
289 (Supplementary Figures 5-40). Thus, strong antibacterial activity was demonstrated in the uncleaved AMP/ELP  
290 fusion proteins but no activity was found in the protease-treated extracts, despite the presence of intact AMP.

## 291 Discussion

292 As a protein expression system, plants bring the unique potential advantage of low-cost production and  
293 scalability. However, the yields of antimicrobial peptides reported from plant systems to date are far lower than  
294 those from *E. coli* and other competing expression systems, suggesting an intrinsic incompatibility between the plant  
295 hosts and the heterologous AMPs expressed. This presents a barrier to commercialization, with yields insufficient to  
296 take advantage of the scalability of plant systems. As an example, the synthetic cationic AMP BP100 showed  
297 phytotoxicity in *Arabidopsis* seedlings and fitness reduction in rice plants (Nadal *et al.*, 2012), and had relatively  
298 low yield in *N. benthamiana* leaves (Company *et al.*, 2013). As another example, seed expression systems often  
299 provide high yields and the expression of the AMP cecropin A in rice seed endosperm did not negatively impact  
300 seed physiology. Even so, the yield was low, ranging from 0.5-6  $\mu\text{g}$  per gram seed tissue weight (Bundó *et al.*,  
301 2014). Taking another approach, protegrin-1 (PG1) was expressed in the powerful magnICON tobacco mosaic virus  
302 (TMV) vector, with the AMP directed to the apoplast of *N. tabacum* leaves, but no yield figures were reported.  
303 Another powerful expression system involves chloroplast expression, which has the added advantage of being  
304 prokaryotic in nature. However, when protegrin was produced as a fusion with GFP in a chloroplast expression  
305 vector, the yield of the purified fusion protein was only 8  $\mu\text{g/g}$  fresh weight of leaf tissue (Patino-Rodriguez *et al.*,  
306 2013; Lee *et al.*, 2010). Finally, fusing AMPs to carrier proteins is normal practice in *E. coli* expression of AMPs

307 and this was attempted with sarcotoxin IA, using GUS as the carrier protein for plant expression. However, the  
308 levels expressed were not sufficient for detection by SDS-PAGE (Okamoto *et al.*, 1998).

309 In our study, we appear to have broken the yield barrier for AMP expression in plants by observing a bias  
310 in peptide charge found naturally in plants and then experimentally demonstrating that, for our set of 10 AMPs, only  
311 the anionic AMPs could be expressed. Our minimum yields for anionic AMPs were slightly above the highest  
312 reported AMP yields in plant expression systems to date; furthermore, our highest yielding AMPs delivered 10-fold  
313 as much. These yields may be compared to those in *E. coli*, which, typically, produces 10-100 mg of AMP from a 1-  
314 liter culture (Li, 2011). In comparison, reported yields from the previously published plant expression systems cited  
315 above would correspond to 1 mg from a medium-sized harvest of 200 g of plant tissue. In contrast, we report an  
316 AMP yield in plants which is comparable to that achieved in *E. coli*. In our study, a minimum yield of 20  $\mu\text{g}$  and a  
317 maximum of 563  $\mu\text{g}$  per gram fresh weight was observed, which would correspond to 4 mg and 113 mg per 200 g of  
318 plant tissue, respectively, equivalent to reported yields for *E. coli* expression systems. In perspective, the best yields  
319 of anionic AMP/ELP fusion peptides in our study also compare favorably to reports for the expression of the marker  
320 gene GFP in *N. benthamiana* plants (270-340  $\mu\text{g}$  GFP/gfw) using a 35S promoter aided by the p19 silencing  
321 suppressor (Voinnet *et al.*, 2003).

322 Furthermore, the AMP/ELP fusion peptides of our study possess an antimicrobial activity (0.22-0.29  $\mu\text{M}$ ) an  
323 order of magnitude stronger than these AMPs expressed from *E. coli* systems (Li *et al.*, 2010; Parachin *et al.*, 2012;  
324 Li *et al.*, 2017; Mao *et al.*, 2013). Thus, on a functional basis, the yield figures we report would be considerably  
325 higher in comparison to those of the *E. coli* systems.

326 The use of elastin-like polypeptide (ELP) as a fusion partner proved important for the yield and antibacterial  
327 activity of anionic AMPs expressed in plants in this study. ELP is an extracellular matrix protein found in vertebrate  
328 connective tissue. When targeted to the endoplasmic reticulum, ELP provides protein sequestering and stability to its  
329 fusion partner (Floss *et al.*, 2009; Sousa *et al.*, 2016; Streatfield *et al.*, 2007). The ELP protein also provides a  
330 purification process using inexpensive temperature shifts without the use of chemicals or chromatography (Floss *et*  
331 *al.*, 2009; Meyer and Chilkoti, 1999). In addition to benefiting yield and purification, we noted that the unusually  
332 high antibacterial activity was associated with the uncleaved ELP fusions. Activity of uncleaved ELP/AMP fusions

333 has not been previously reported in *E. coli* expression systems. Further studies are in progress in our lab to elucidate  
334 the protein structural aspects of antimicrobial activity of AMP fused to the ELP carrier.

335 Plant expression of AMPs seems well suited to large scale, low-margin applications and the effectiveness of  
336 AMPs has already demonstrated as poultry and livestock feed additives (Juarez *et al.*, 2016), food preservatives (Rai  
337 *et al.*, 2016) and topical disinfectants (Pfalzgraff *et al.*, 2018). The scalability of plant expression systems would  
338 allow for the production of large amounts of raw product, which could then be reduced to relatively pure protein by  
339 simple temperature shift cycles, potentially without the need for column chromatography, which increases post-  
340 production costs (Wilkin and Nikolov, 2012). Alternatively, the AMPs might be expressed in transgenic grain seed,  
341 which tends to have yields higher than seen in leaf tissue. Recombinant proteins remain stable using traditional seed  
342 storage technique (Boothe *et al.*, 2010; Morandini *et al.*, 2011; Hnatuszko-Konka *et al.*, 2016). Anionic AMPs used  
343 in the seed platform would address the increasing concern over the amount of antibiotics used with livestock  
344 (Ferber, 2003; Massé *et al.* 2014; Hao *et al.*, 2015). Applications in animal feed have already shown limited success  
345 in protecting livestock against pathogens using antibodies and antimicrobial peptides (Virdi *et al.*, 2013; Lee *et al.*,  
346 2010). Since the ELP/AMP fusion protein does not need to be cleaved, it would be expected that the resulting grain  
347 should be directly antimicrobial, without proteolytic processing. Proteins encapsulated in plant tissue may be  
348 expected to better survive the digestive system to arrive intact to eliminate gut pathogens (Sabalza *et al.*, 2013).  
349 Furthermore, AMPs would largely eliminate the environmental consequences of pesticide use. Being peptides,  
350 AMPs would be expected to have a very short half-life in soil or aquatic environments.

351 A final advantage to using AMPs is to avoid the development of resistance in target bacteria and the microbiota  
352 as a whole (Perron *et al.*, 2006; Maróti *et al.* 2011). As already mentioned, amphipathic AMPs have a generalized  
353 mechanism for destroying bacteria by membrane disruption and other mechanisms, which inhibits resistance  
354 development (Peschel and Sahl, 2006; Nguyen *et al.*, 2011). Furthermore, it would be relatively easy to supply  
355 AMPs as "stacked drugs" by including several AMPs in the same treatment or in the same grain seed genome. In  
356 this way, resistance development is further forestalled since any resistance mutant that appears would be destroyed  
357 by another AMP with a divergent mode of action in the treatment mix. The sheer abundance of putative AMP  
358 sequences in genome databases is a vast resource for the rapid discovery and testing of large numbers of AMPs to  
359 support a stacked drug paradigm, as opposed to the slow development cycle of small molecule antibiotic drugs. We



360 have added to the capacity of this developmental pipeline by developing several algorithms for detecting AMPs  
361 from genomic databases. We can now predict sequential tri-disulfide peptides (STPs) from genomes using a support  
362 vector machine algorithm (Islam *et al.*, 2015). STPs are the predominant structural form of AMPs and are study,  
363 robust structures (Islam *et al.*, 2018b). We have developed a generalized algorithm based on natural language  
364 processing to classify protein sequence based on any input characteristic (Islam *et al.*, 2018a) and this has been used  
365 to predict protein function from genome sequences, such as picking AMP function while rejecting hemolytic activity  
366 to avoid human toxicity (Islam *et al.*, 2018c). Anionic AMP candidate sequences from these genome searches can be  
367 expressed as ELP/AMP fusion peptides in plants with the expectation that a significantly proportion would express  
368 at high yield, as we observed in our present study. These fusion peptides could then be screened as extracts from a  
369 single thermal shift cycle, accelerating the screening workflow process.

370

## 371 **Conflict of Interests Statement**

372 On behalf of all authors, the corresponding author states that there is no conflict of interest.

373

374

## 375 **References**

376 Aminov, R.I. (2010) A brief history of the antibiotic era: lessons learned and challenges for the future. *Front*  
377 *Microbiol.* **1(134)**, 1-7. doi: [10.3389/fmicb.2010.00134](https://doi.org/10.3389/fmicb.2010.00134)

378 Bengtsson-Palme, J., Kristiansson, E., Larsson, D.G.J. (2018) Environmental factors influencing the  
379 development and spread of antibiotic resistance. *FEMS Microbiology Reviews* **42**, 68–80. doi:  
380 10.1093/femsre/fux053

381 Boothe, J., Nykiforuk, C., Shen, Y., Zaplachinski, S., Kuhlman, P., Murray, E., Morck, D., Moloney, M. M.  
382 (2010) Seed-based expression systems for plant molecular farming. *Plant Biotechnol. J.* **8**, 588-606. doi:  
383 10.1111/j.1467-7652.2010.00511.x.

384 Bundó, M., Montesinos, L., Izquierdo, E., Campo, S., Mieulet, D., Guideroni, E., Rossignol, M., Badosa, E.,  
385 Montesinos, E., Segundo, B.S., Coca, M. (2014) Production of cecropin A antimicrobial peptide in rice seed  
386 endosperm. *BMC Plant Biol.* **14**, 102-114. doi: 10.1186/1471-2229-14-102.

387 Charles, PG and Grayson, ML. (2004) The dearth of new antibiotic development: why we should be worried  
388 and what we can do about it. *Med J Aust.* **181(10)**, 549-553.

389 Company, N., Nadal, A., Ruiz, C., Pla, M. (2014) Production of Phytotoxic Cationic  $\alpha$ -Helical Antimicrobial  
390 Peptides in Plant Cells using Inducible Promoters. *PLoS ONE.* **9(11)**, 1-14. doi: 10.1371/journal.pone.0109990

- 391 Conley A.J., Joenssu, J.J., Menassa, R., Brandle, J.E. (2009a) Induction of protein body formation in plant  
392 leaves by elastin-like polypeptide fusions. *BMC Biol.* **7(48)**, 1-18. doi: 10.1186/1741-7007-7-48
- 393 Conley, A.J., Joensuu, J.J., Jevnikar, A.M., Menassa, R., Brandle, J.E. (2009b) Optimization of Elastin-Like  
394 Polypeptide Fusions for Expression and Purification of Recombinant Proteins in Plants. *Bioetchnol Bioeng.*  
395 **103(3)**, 592-573. doi: 10.1002/bit.22278
- 396 Dubovskii, P.V., Vassilevski, A.A., Kozlov, S.A., Feofanov, A.V., Grishin, E.V., Efremov, R.G. (2015).  
397 Latarecins: versatile spider venom peptides. *Cell Mol Life Sci.* **72**, 4501-4522. doi: 10.1007/s00018-015-2016-x
- 398 Ebbensgaard, A., Mordhorst, H., Overgaard, M.T., Nielsen, C.G., Aarestrup, F.M., Hansen, E.B. (2015)  
399 Comparative Evaluation of the Antimicrobial Activity of Different Antimicrobial Peptides against a Range of  
400 Pathogenic Bacteria. *PLoS ONE* 10(12): e0144611. doi:10.1371/journal.pone.0144611
- 401 Enright, M.C., Robinson, D.A., Randle, G., Feil, E.J., Grundmann, H., Spratt, B.G. (2002) The evolutionary  
402 history of methicillin-resistant *Staphylococcus aureus* (MRSA). *Proc Natl Acad Sci U S A.* **99(11)**, 7687-7692.  
403 PMID 12032344
- 404 Ferber, D. (2003) WHO Advises Kicking the Livestock Antibiotic Habit. *Science.* **301**, 1027. PMID 12933980
- 405 Floss D.M., Schallau, K., Rose-John, S., Conrad, U., Scheller, J. (2009) Elastin-like polypeptides revolutionize  
406 recombinant protein expression and their biomedical application. *Trends Biotechnol.* **28**, 37-45. doi:  
407 10.1016/j.tibtech.2009.10.004
- 408 Gleba Y., Klimyuk, V., Marillonnet, S. (2005) Magniffection—a new platform for expressing recombinant  
409 vaccines in plants. *Vaccine.* **23**, 2042-2048. PMID 15755568
- 410 Hancock, R.E. and Sahl, H.G. (2006) Antimicrobial and host-defense peptides as new anti-infective therapeutic  
411 strategies. *Nat Biotechnol.* **24**, 1551-1557. PMID 17160061
- 412 Hao, R., Zhao, R., Qiu, S., Wang, L., Song, H. (2015) Antibiotics crisis in China. *Science.* **348**, 1100-1101. PMID  
413 26045427
- 414 Harris, F., Dennison, S.R., Phoenix, D.A. (2009) Anionic Antimicrobial Peptides from Eukaryotic Organisms.  
415 *Curr Protein Pept Sci.* **10**, 585-606. PMID 19751192
- 416 He, Y., Lazaridis, T. (2013) Activity Determinants of Helical Antimicrobial Peptides: A Large-Scale  
417 Computational Study. *PLoS ONE* 8(6): e66440. doi:10.1371/journal.pone.0066440
- 418 Hiramatsu, K., Cui, L., Kuroda, M., Ito, T. (2001) The emergence and evolution of methicillin-resistant  
419 *Staphylococcus aureus*. *Trends Microbiol.* **9(10)**, 486-493. PMID 11597450
- 420 Hnatuszko-Konka, K., Luchniak, P., Wiktorek-Smagur, A., Kowalczyk, T., Gatkowska, J., Kononowicz, A.K.  
421 (2016) The pharmaceuticals from the foreign empire: the molecular pharming of the prokaryotic staphylokinase  
422 in *Arabidopsis thaliana* plants. *World J Microbiol Biotechnol.* **32**, 113 doi: 10.1007/s11274-016-2070-z
- 423 Islam S.M.A., Sajed T., Kearney C.M., Baker E.J. (2015) PredSTP: a highly accurate SVM based model to  
424 predict sequential cystine stabilized peptides. *BMC Bioinformatics* **16**:210. doi:10.1186/s12859-015-0633-x
- 425 Islam, S.M.A., Heil, B.J., Kearney, C.M., and Baker, E.J. (2018a) Protein classification using modified n-grams  
426 and skip-grams. *Bioinformatics* **34**:1481-1487. doi: 10.1093/bioinformatics/btx82

- 427 Islam, S.M.A., Kearney, C.M., and Baker, E.J. (2018b) Classes, databases and prediction methods of  
428 pharmaceutically and commercially important cystine-stabilized peptides. *Toxins* **10**(6). pii: E251. doi:  
429 10.3390/toxins10060251
- 430 Islam, S.M.A., Kearney, C.M., and Baker, E.J. (2018c) Assigning biological function using hidden signatures in  
431 cystine-stabilized peptide sequences. *Sci Rep* **8**(1):9049. doi: 10.1038/s41598-018-27177-8
- 432 Joensuu, J.J., Conley, A.J., Lienemann, M., Brandle, J.E., Linder, M.B., Menassa, R. (2010) Hydrophobin  
433 fusions for high-level transient protein expression and purification in *Nicotiana benthamiana*. *Plant Physiol*  
434 **152**(2):622-33. doi: 10.1104/pp.109.149021
- 435 Juarez. P., Viridi, V., Depicker, A., Orzaez, D. (2016) Biomanufacturing of protective antibodies and other  
436 therapeutics in edible plant tissues for oral applications. *Plant Biotechnol J.* **14**, 1791-1799. doi:  
437 10.1111/pbi.12541
- 438 Ke, T., Liang, S., Huang, J., Mao, H., Chen, J., Dong, C., Huang, J., Liu, S., Kang, J., Liu, D., Ma, X. (2012) A  
439 novel PCR-based method for high throughput prokaryotic expression of antimicrobial peptide genes. *BMC*  
440 *Biotechnol* 2012, 12:10. <http://www.biomedcentral.com/1472-6750/12/10>
- 441 Kubicek-Sutherland, J.Z., Lofton, H., Vestergaard, M., Hjort, K., Ingmer, H., Andersson, D.I. (2017)  
442 Antimicrobial peptide exposure selects for *Staphylococcus aureus* resistance to human defence peptides. *J*  
443 *Antimicrob Chemother* **72**(1):115-127. doi: 10.1093/jac/dkw381
- 444 Lai, R., Lomas, L.O., Jonczy, J., Turner, P.C., Rees, H.H. (2004) Two novel non-cationic defensin-like  
445 antimicrobial peptides from haemolymph of the female tick, *Amblyomma hebraeum*. *Biochem J.* **379**, 681-385.  
446 doi: [10.1042/BJ20031429](https://doi.org/10.1042/BJ20031429)
- 447 Lee, S., Li, B., Jin, S., Daniell, H. (2011) Expression and characterization of antimicrobial peptides Retrocyclin-  
448 101 and Protegrin-1 in chloroplasts to control viral and bacterial infections. *Plant Biotechnol. J.* **9**(1), 100-115.  
449 doi: 10.1111/j.1467-7652.2010.00538.x
- 450 Lee, T., Chang, C., Juang, R., Chen, R., Yang, H., Chu, L., Tseng, T., Wang, C., Chen, L., Yu, B. (2010)  
451 Porcine Lactoferrin Expression in Transgenic Rice and Its Effects as a Feed Additive on Early Weaned Piglets.  
452 *J. Agric. Food Chem.* **58**, 5166-5173. doi: 10.1021/jf903904s
- 453 Li J.F., Zhang, J., Song, R., Zhang, J.X., Shen, Y., Zhang, S.Q. (2009) Production of a cytotoxic cationic  
454 antibacterial peptide in *Escherichia coli* using SUMO fusion partner. *Appl Microbiol Biotechnol* **84**, 383-388.  
455 doi: 10.1007/s00253-009-2109-2. doi:10.1042/BA20090087
- 456 Li, Y. Carrier proteins for fusion expression of antimicrobial peptides in *Escherichia coli*. (2009) *Biotechnol*  
457 *Appl Biochem* **54**, 1-9.
- 458 Li, Y. (2011) Recombinant production of antimicrobial peptides in *Escherichia coli*: a review. *Protein Expr*  
459 *Purif.* **80**(2), 260-267. doi: 10.1016/j.pep.2011.08.001
- 460 Li, C., Blencke, H.M., Paulsen, V., Haug, T., Stensvag, K. (2010) Powerful workhorses for antimicrobial  
461 peptide expression and characterization. *Bioeng Bugs* **1**(3), 217-220. doi: [10.4161/bbug.1.3.11721](https://doi.org/10.4161/bbug.1.3.11721)
- 462 Li, W. and Godzik, A. (2006) Cd-hit: a fast program for clustering and comparing large sets of protein or  
463 nucleotide sequences. *Bioinformatics.* **22**(13), 1658-1659. doi: [10.1093/bioinformatics/btl158](https://doi.org/10.1093/bioinformatics/btl158)

- 464 Li, Z., Wang, X., Wang, X., Teng, D., Mao, R., Hao, Y., Wang, J. (2017) Research advances on plectasin and  
465 its derivatives as new potential antimicrobial candidates. *Process Biochem* **56**, 62-70. doi:  
466 <https://doi.org/10.1016/j.procbio.2017.02.006>
- 467 Liang, Y., Wang, J., Zhao, X., Du, X., Xue, J. (2006). Molecular cloning and characterization of cecropin from  
468 the housefly (*Musca domestica*), and its expression in *Escherichia coli*. *Dev Comp Imm* **30**:249-257. doi:  
469 10.1016/j.dci.2005.04.005
- 470 Liu Z. and Kearney C.M. (2010) An efficient *Foxtail mosaic virus* vector system with reduced environmental  
471 risk. *BMC Biotechnol.* **10**, 88-100. doi: 10.1186/1472-6750-10-88
- 472 Mao, R., Teng, D., Wang, X., Xi, D., Zhang, Y., Hu, X., Yang, Y., Wang, J. (2013) Design expression, and  
473 characterization of a novel targeted plectasin against methicillin-resistant *Staphylococcus aureus*. *Appl.*  
474 *Microbiol. Biotechnol.* **97** (2013) 3991–4002. doi: <https://doi.org/10.1007/s00253-012-4508-z>
- 475 Maróti, G., Kereszt, A., Kondorosi, E., Mergaert, P. (2011) Natural roles of antimicrobial peptides in microbes,  
476 plants and animals. *Res Microbiol.* **162**, 363-374 doi: 10.1016/j.resmic.2011.02.005
- 477 Marr, A.K., Gooderham, W.J., Hancock, R.E.W. (2006) Alexandra K Marr, William J Gooderham and Robert  
478 EW Hancock. *Curr Opin Pharm* 2006, **6**:468–472 doi: 10.1016/j.coph.2006.04.006
- 479 Meyer D.E. and Chilkoti, A. (1999) Purification of recombinant proteins by fusion with thermally-responsive  
480 polypeptides. *Nat Biotechnol.* **17**(11), 1112-1115. doi: [10.1038/15100](https://doi.org/10.1038/15100)
- 481 Moehnke, M.H., Midoro-Horiuti, T., Goldblum, R.M., Kearney, C.M. (2008) The expression of a mountain  
482 cedar allergen comparing plant-viral apoplast and yeast expression systems. *Biotechnol Lett* **30**(7):1259-64.  
483 doi: 10.1007/s10529-008-9665-x.
- 484 Morandini, F., Avesani, L., Bortesi, L., Droogenbroeck, B.V., Wilde, K.D., Arcalis, E., Bazzoni, F., Santi, L.,  
485 Brozzetti, A., Falorni, A., Stoger, E. (2011) Non-food/feed seeds as biofactories for the high-yield production of  
486 recombinant pharmaceuticals. *Plant Biotechnol. J.* **9**, 911-921. doi: [10.1111/j.1467-7652.2011.00605.x](https://doi.org/10.1111/j.1467-7652.2011.00605.x)
- 487 Nadal, A., Montero, M., Company, N., Badosa, E., Messegue, J., Montesinos, L., Montesinos, E., Pla, M.  
488 (2012) Constitutive expression of transgenes encoding derivatives of the synthetic antimicrobial peptide BP100:  
489 impact on rice host plant fitness. *BMC Plant Biol.* **12**, 159. doi: [10.1186/1471-2229-12-159](https://doi.org/10.1186/1471-2229-12-159)
- 490 Nakasu, E.Y.T., Edwards, M.G., Fitches, E., Gatehouse, J.A., Gatehouse, A.M.R. (2014) Transgenic plants  
491 expressing G $\alpha$ -ACTX-Hv1a and snowdrop lectin (GNA) fusion protein show enhanced resistance to aphids.  
492 *Front Plant Sci.* **5**, 673. doi: [10.3389/fpls.2014.00673](https://doi.org/10.3389/fpls.2014.00673)
- 493 Nathan, C. and Cars, O. (2014) Antibiotic Resistance - Problems, Progress, and Prospects. *N Engl J Med.* **371**,  
494 1767-1763. doi: [10.1056/NEJMp1408040](https://doi.org/10.1056/NEJMp1408040)
- 495 Nawrot, R., Barylski, J., Nowicki, G., Broniarczyk, J., Buchwald, W., Goździcka-Józefiak, A. (2014) Plant  
496 antimicrobial peptides. *Folia Microbiol (Praha).* **59**, 181-196. doi: [10.1007/s12223-013-0280-4](https://doi.org/10.1007/s12223-013-0280-4)
- 497 Nguyen L.T., Haney, E.F., Vogel, H.J. (2011) The expanding scope of antimicrobial peptide structures and their  
498 modes of action. *Trends in Biotechnology.* **29**(9), 464-476. doi: 10.1016/j.tibtech.2011.05.001
- 499 Norrby, SR., Nord, C.E., Finch, R., European Society of Clinical Microbiology and Infectious Diseases. (2005)  
500 Lack of development of new antimicrobial drugs: a potential serious threat to public health. *Lancet Infect Dis.*  
501 **5**(2), 115-119. doi: [10.1016/S1473-3099\(05\)01283-1](https://doi.org/10.1016/S1473-3099(05)01283-1)

- 502 Okamoto, M., Mitsuhashi, I., Ohshima, M., Natori, S., Ohashi, Y. (1998) Enhanced Expression of an  
503 Antimicrobial Peptide Sarcotoxin IA by GUS Fusion in Transgenic Tobacco Plants. *Plant Cell Physiol.* **39(1)**,  
504 57-63. PMID 9517001
- 505 Patino-Rodriguez O., Ortega-Berlanga, B., Llamas-González, Y.Y., Flores-Valdez, M.A., Herrera-Díaz, A.,  
506 Montes-de-Oca-Luna, R., Korban, S.S., Alpuche-Solís, A.G. (2013) Transient Expression and characterization  
507 of the antimicrobial peptide protegrin-1 in *Nicotiana tabacum* for control of bacterial and fungal mammalian  
508 pathogens. *Plant Cell Tissue Organ Cult.* **115**, 99-106. doi: 10.1007/s11240-013-0344-9
- 509 Perron G.G., Zasloff, M., Bell, G. (2006) Experimental evolution of resistance to antimicrobial peptide. *Proc Biol*  
510 *Sci.* **273**, 251-256. doi: [10.1098/rspb.2005.3301](https://doi.org/10.1098/rspb.2005.3301)
- 511 Peschel A., Sahl H.G. (2006) The co-evolution of host cationic antimicrobial peptides and microbial resistance.  
512 *Nat Rev Microbiol.* **4(7)**:529-36. doi: 10.1038/nrmicro1441
- 513 Pfalzgraff A., Brandenburg K., Weindl G. (2018) Antimicrobial Peptides and Their Therapeutic Potential for  
514 Bacterial Skin Infections and Wounds. *Front Pharmacol* **9**:281. doi: 10.3389/fphar.2018.00281
- 515 Rai, M., Pandit, R., Gaikwad, S., Kövics, G. (2016) Antimicrobial peptides as natural bio-preservative to  
516 enhance the shelf-life of food. *J Food Sci Technol* **53(9)**:3381-3394. doi: 10.1007/s13197-016-2318-5
- 517 Rothan, H., Bahrani, H., Mohamed, Z., Rahman, N.A., Yusof, R. (2014) Fusion of Protegrin-1 and Plectasin to  
518 MAP30 Shows Significant Inhibition Activity against Dengue Virus Replication. *PLoS ONE* **9(4)**: e94561  
519 doi:10.1371/journal.pone.0094561
- 520 Sabalza, M., Vamvaka, E., Christou, P., Capell, T. (2013) Seeds as a production system for molecular pharming  
521 applications: status and prospects. *Curr Pharm Des* **19(31)**:5543-5552. doi: 10.2174/1381612811319310009
- 522 Schäberle, T.F. and Hack, I.M. (2014) Overcoming the current deadlock in antibiotic research. *Trends*  
523 *Microbiol.* **22(4)**, 165-167. doi: [10.1016/j.tim.2013.12.007](https://doi.org/10.1016/j.tim.2013.12.007)
- 524 Singh, P. K., Chittipurna, Asish, Vikas Sharma, Patil, P.B., Korpole, S. (2012) Identification, Purification and  
525 Characterization of Laterosporulin, a Novel Bacteriocin Produced by *Brevibacillus* sp. Strain GI-9. *PLoS One.*  
526 **7(3)**, e31498. doi: [10.1371/journal.pone.0031498](https://doi.org/10.1371/journal.pone.0031498)
- 527 Sousa, D.A., Mulder, K.C.L., Nobre, K.S., Parachin, N.S., Franco, O.L. (2016) Production of polar fish  
528 antimicrobial peptide in *Escherichia coli* using an ELP-intein tag. *J Biotechnol.* **234**, 83-89. doi:  
529 10.1016/j.jbiotec.2016.07.021.
- 530 Streatfield, S.J. (2007) Approaches to achieve high-level heterologous protein production in plants. *Plant*  
531 *Biotechnol J.* **5**, 2-15. doi: 10.1111/j.1467-7652.2006.00216.x
- 532 Thung, I., Aramin, H., Vavinskaya, V., Gupta, S., Park, J.Y., Crowe, S.E., Valasek, M.A. (2015) Review  
533 article: the global emergence of *Helicobacter pylori* antibiotic resistance. *Ailment Pharmacol Ther.* **43(4)**, 514-  
534 533. doi: 10.1111/apt.13497
- 535 Tian, Z., Dong, T., Yang, Y., Teng, D., Wang, J. (2009) Expression of antimicrobial peptide LH multimers in  
536 *Escherichia coli* C43(DE3). *Appl Microbiol Biotechnol* **83**:143-149.
- 537 Viridi, V., Coddens, A., De Buck, S., Millet, S., Goddeeris, B.M., Cox, E., De Greve, H., Depicker, A. (2013)  
538 Orally fed seeds producing designer IgAs protect weaned piglets against enterotoxigenic *Escherichia coli*  
539 infection. *Proc Natl Acad Sci U S A.* **110(29)**, 11809-118814. doi: 10.1073/pnas.1301975110

- 540 Voinnet O, Rivas S, Mestre P, Baulcombe D: An enhanced transient expression system in plants based on  
541 suppression of gene silencing by the p19 protein of tomato bushy stunt virus. (2003) *Plant J* **33**(5):949-956.
- 542 Wang, G., Li, X., Wang, Z. (2009) APD2: the updated antimicrobial peptide database and its application in  
543 peptide design. *Nucleic Acids Res* **37**, 933-937. doi: 10.1093/nar/gkn823
- 544 Wang, G., Mishra, B., Lau, K., Lushnikova, T., Golla, R., Wang, X. (2015) Antimicrobial Peptides in 2014.  
545 *Pharmaceuticals (Basel)*. **8**(1), 123-150. doi: 10.3390/ph8010123
- 546 Wei Q., Kim, Y.S., Seo, J.H., Jang, W.S., Lee, I.H., Cha, H.J. (2005). Facilitation of expression and purification  
547 of an antimicrobial peptide by fusion with baculoviral polyhedrin in *Escherichia coli*. *Appl Environ Microbiol*.  
548 **71**(9):5038-43. doi: 10.1128/AEM.71.9.5038-5043.2005
- 549 Wilken, L.R., Nikolov, Z.L. (2012) Recovery and purification of plant-made recombinant proteins. *Biotech Adv*  
550 **3**, 419–433. doi: 10.1016/j.biotechadv.2011.07.020
- 551 Zhang, J., Movahedi. A., Xu, J., Wang, M., Wu, X., Xu C., Yin, T., Qiang, Z. (2015) *In vitro* production and  
552 antifungal activity of peptide ABP-dHC-cecropin A. *J. Biotech* **199**, 47-54.  
553 doi.org/10.1016/j.jbiotec.2015.02.018
- 554
- 555
